# Supplementary material for: A facile strategy for new organic white LED hybrid devices: design, features and engineering
Source: Royal Society of Chemistry journal article supplement (doi:10.1039/c6ra00999a), 2016-01-01

# Supporting Information for

A facile strategy for new organic White LED hybrid devices: design, features and engineering.

---

**Alberto Luridiana<sup>1,2</sup>, GianLuca Pretta<sup>1,2</sup>, Daniele Chiriu<sup>2,3</sup>, Carlo Maria Carbonaro<sup>2</sup>, Riccardo Corpino<sup>2</sup>, Francesco Secci<sup>1</sup>, Angelo Frongia,<sup>2</sup> Luigi Stagi<sup>2</sup> and Pier Carlo Ricci\*<sup>2,3</sup>**

<sup>1</sup> Dipartimento di Scienze Chimiche e Geologiche, Università d Cagliari, SS 554 bivio Sestu, I-09042 Monserrato (CA), Italy

<sup>2</sup> Dipartimento di Fisica, Università degli Studi di Cagliari, S.P. Monserrato-Sestu Km 0.700, 09042 Monserrato (CA), Italy

<sup>3</sup> E-laboRad s.r.l., spin-off, Dip Fisica, Università degli Studi di Cagliari, S.P. Monserrato-Sestu Km 0,700 09042 Monserrato (CA), Italy

\* Corresponding author: carlo.ricci@dsf.unica.it

## Materials

<sup>1</sup>H NMR spectra were recorded on 400 and 500 MHz Varian spectrometers at 27°C using CDCl<sub>3</sub> as solvent. <sup>13</sup>C NMR were recorded at 101 and 126 MHz at 27°C using CDCl<sub>3</sub>. Chemical shifts ( $\delta$ ) are given in ppm. Coupling constants (*J*) are reported in Hz. Yields refer to chromatography and spectroscopically pure materials.

### coumarin Dye -1 NMR data

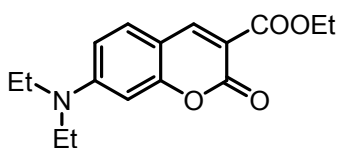

**7-Diethylamino-2-oxo-2H-chromene-3-carboxylic acid ethyl ester.** Mp 85-87

°C. <sup>1</sup>H NMR (500 MHz, CDCl<sub>3</sub>)  $\delta$ : 8.41 (s, 1H) 7.35 (d, *J* = 9.0 Hz 1H) 6.61 (dd, *J* = 9.0, 2.3 Hz, 1H) 6.43 (d, *J* = 2.0 Hz, 1H) 4.37 (q, *J* = 7.1 Hz 2H) 3.45 (q, *J* = 7.1 Hz 4H) 1.39 (t, *J* = 7.1 Hz, 3H) 1.23 (t, *J* = 7.2 Hz 6H); <sup>13</sup>C NMR (126 MHz, CDCl<sub>3</sub>)  $\delta$ : 163.9, 158.2, 158.0 152.7 148.9 130.8 109.3 108.5 107.4 96.4 60.8 44.9 14.18 12.23; Spectroscopic data are in accordance with the previously presented <sup>1a</sup>; ESI mass calc. for C<sub>16</sub>H<sub>19</sub>NNaO<sub>4</sub>: 312.1212, found: (M+Na) 312.1205.

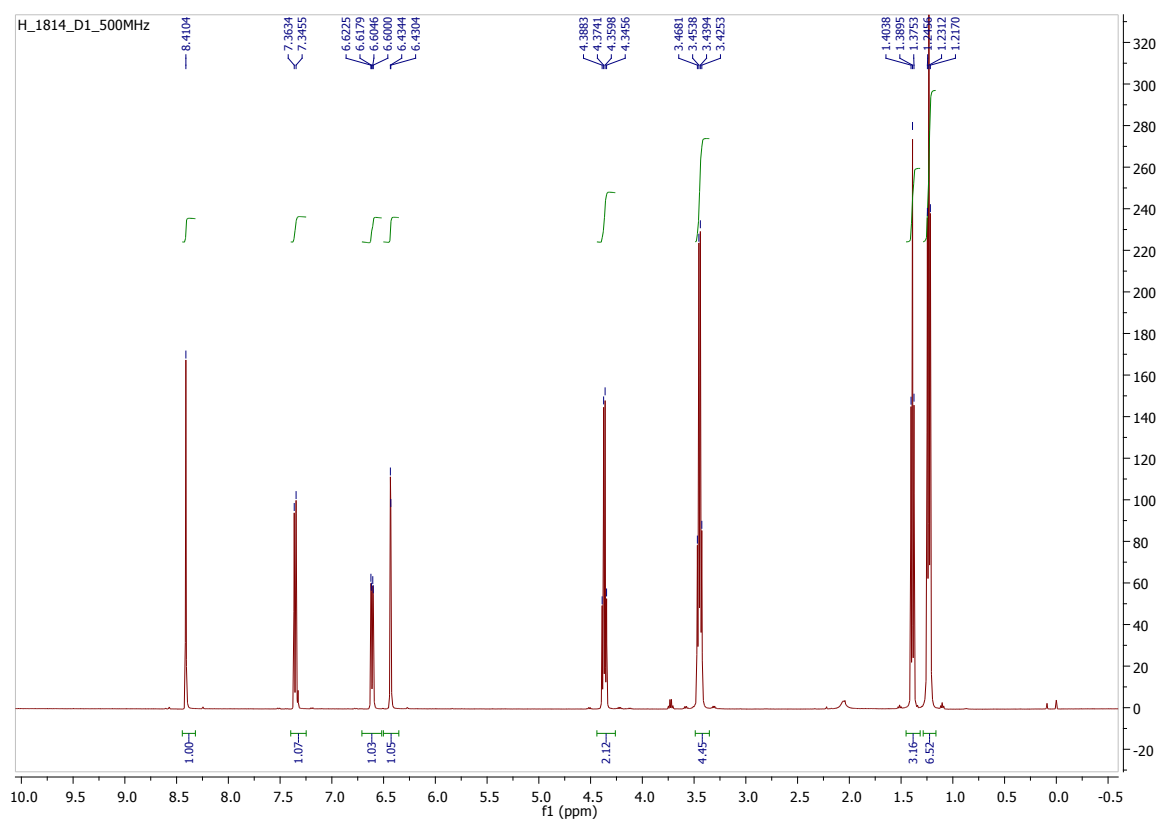

Figure S1A Dye 1 <sup>1</sup>H-NMR spectrum,

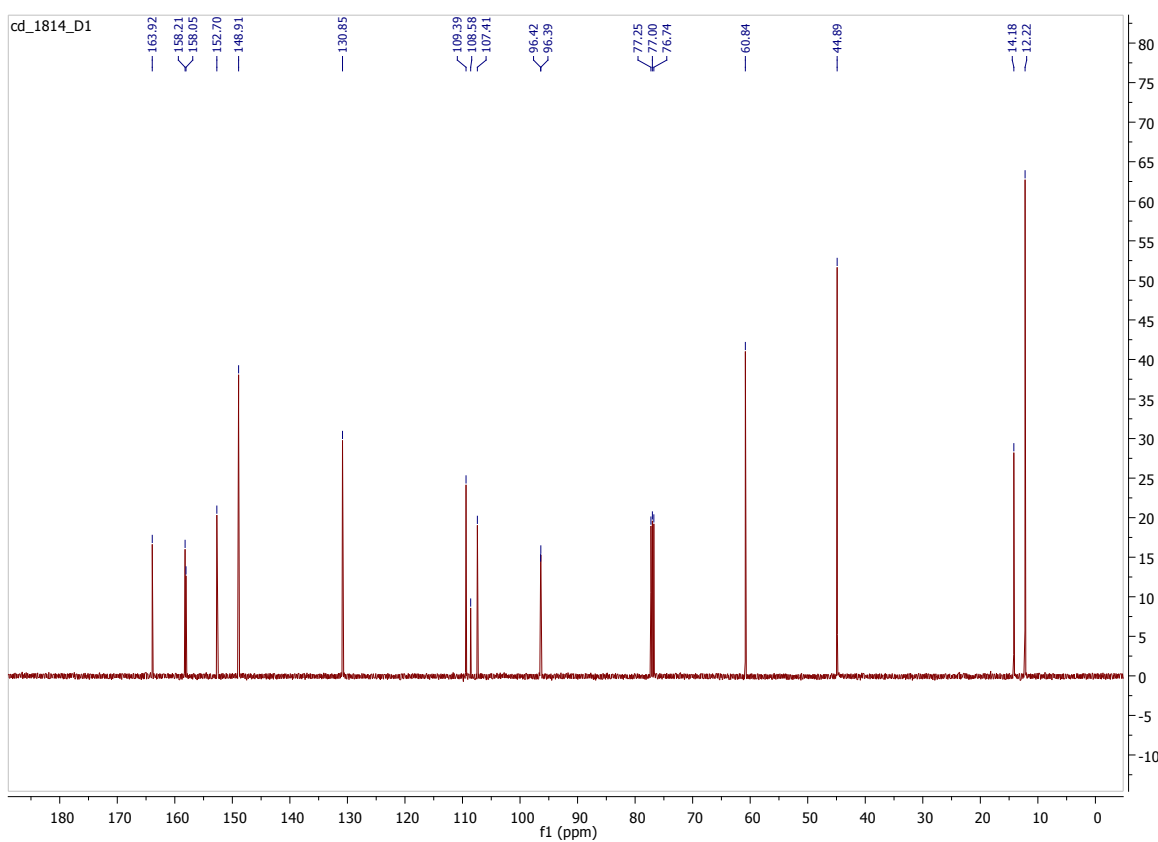

Figure S1B – dye 1 <sup>13</sup>C-NMR spectrum

### Quantum Yield Measurements ( $\phi_f$ )

Absolute quantum yield fluorescence were obtained by absorption and emission measurements with respect to reference sample. Considering the emission wavelength of the Dye -1 at about 450 nm and between 350 and 450 nm, the chosen reference solution of Coumarin 153 in EtOH was chosen.

The Quantum Yield can be calculated by the equation:

$$\phi_f = \frac{m_f}{m_{st}} \frac{n_f^2}{n_{st}^2} \phi_{st}$$

Where subscripts of  $f$  and  $std$  denoted test and standard condition;  $m$  is the gradient from the plot of the integrated fluorescence intensity vs the absorbance at the excitation wavelength;  $n$  is the refractive index of solvents.

In order to minimize re-absorption and non-linear effects, the concentration of the solution were chosen in order that absorbance values remain always below 0.1

**Figure S2** reports Abs vs integrated luminescence for Dye -1 in  $\text{CHCl}_3$  solution and for Coumarin 153 in EtOH. Table S1 reports the value utilized for the calculation of the **quantum yield ( $\phi_f=0.91$ )**.

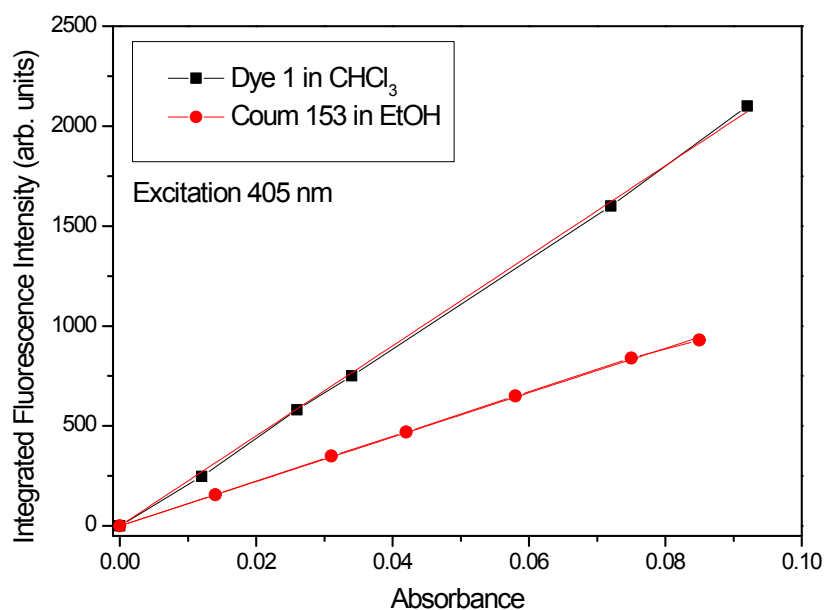

| $m_{st}$ | $m_x$ | $n_{st}$ | $n_x$ | $\phi_{std}$ |
|----------|-------|----------|-------|--------------|
| 11105    | 22736 | 1.34     | 1.45  | 0.38         |

**Figure S3** Normalized light output intensity as a function of the working time (device C in Figure 10). The emission spectra did not change during the exposed time (inset).

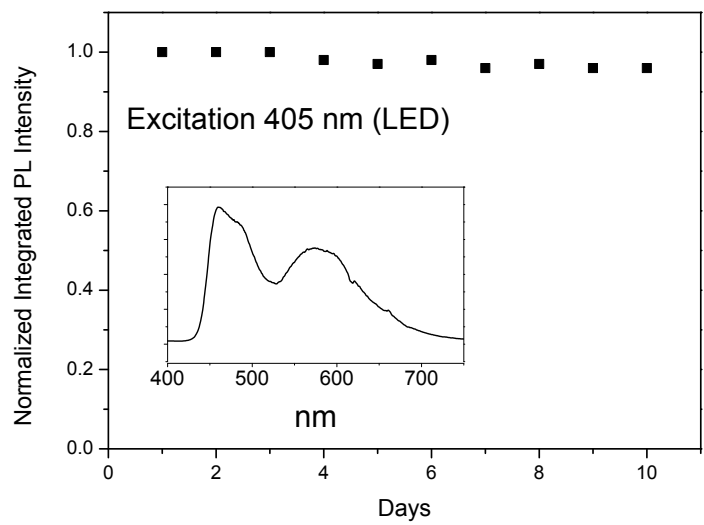

**Figure S4** Luminescence intensity vs film temperature.

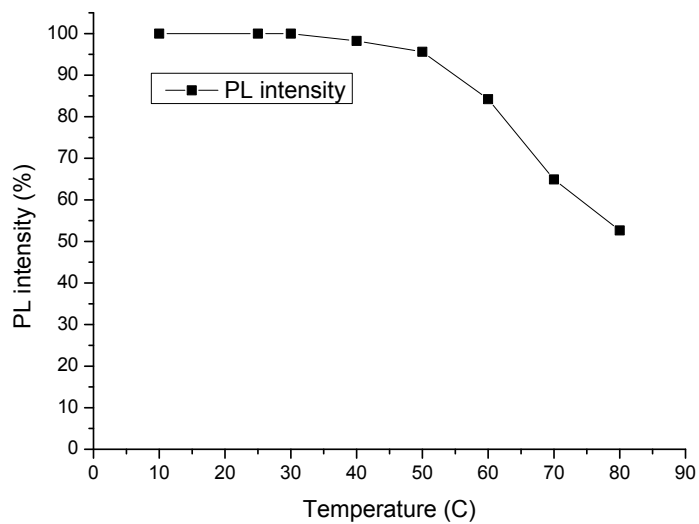

Supplement: c6ra00999a1.pdf [file c6ra00999a1.pdf]
